# Supplementary material for: Plasma-Induced Oxygen Vacancies in N-Doped Hollow NiCoPBA Nanocages Derived from Prussian Blue Analogue for Efficient OER in Alkaline Media
Source: Int J Mol Sci. 2023 May 25;24(11):9246. doi: 10.3390/ijms24119246 (PMC10252958; doi:10.3390/ijms24119246)
Supplement: Supplementary file 1 [file ijms-24-09246-s001.zip › ijms-2393268-supplementary.pdf]

## Supporting information

### Plasma-Induced Oxygen Vacancies in N-doped Hollow NiCoPBA Nanocages Derived from Prussian Blue Analogue for Efficient OER in Alkaline Media

Huu Tuan Le<sup>1,†</sup>, Ji Eon Lee<sup>1,2,†</sup>, So Yeon Yun<sup>1,3</sup>, Ohyung Kwon<sup>1</sup>, Jin Kuen Park<sup>3,\*</sup>, Young Kyu Jeong<sup>1,\*</sup>

<sup>1</sup> Functional Materials & Components R&D group, Korea Institute of Industrial Technology (KITECH), 137–41 Gwahakdanji-ro, Gangneung-si, Gangwon 25440, Republic of Korea.

<sup>2</sup> Department of Materials Science and Engineering, Korea University, 145 Anam-ro, Seongbuk-gu, Seoul 02841, Republic of Korea.

<sup>3</sup> Department of Chemistry, Hankuk University of Foreign Studies, Yongin, 17035, Gyeonggi-do, Republic of Korea

<sup>†</sup> These authors contributed equally to this work.

\*E-mail: jinkpark@hufs.ac.kr, immrc@kitech.re.kr

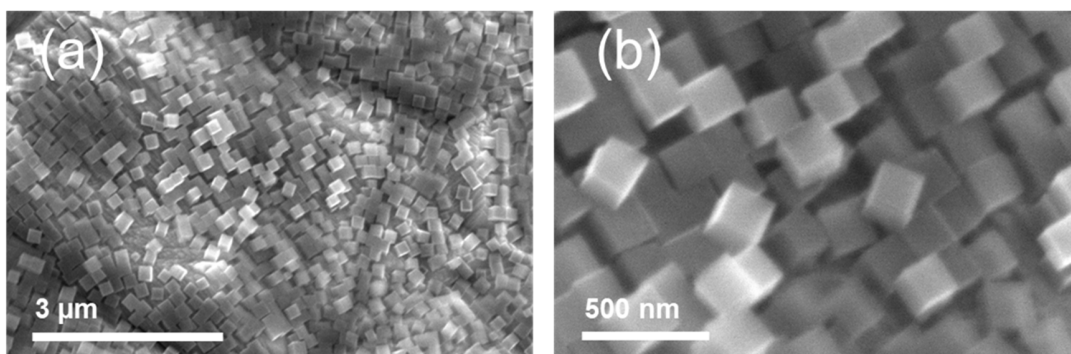

**Figure S1.** SEM image of Pristine NiCoPBA and high magnification. (a) 3 μm, (b) 500 nm

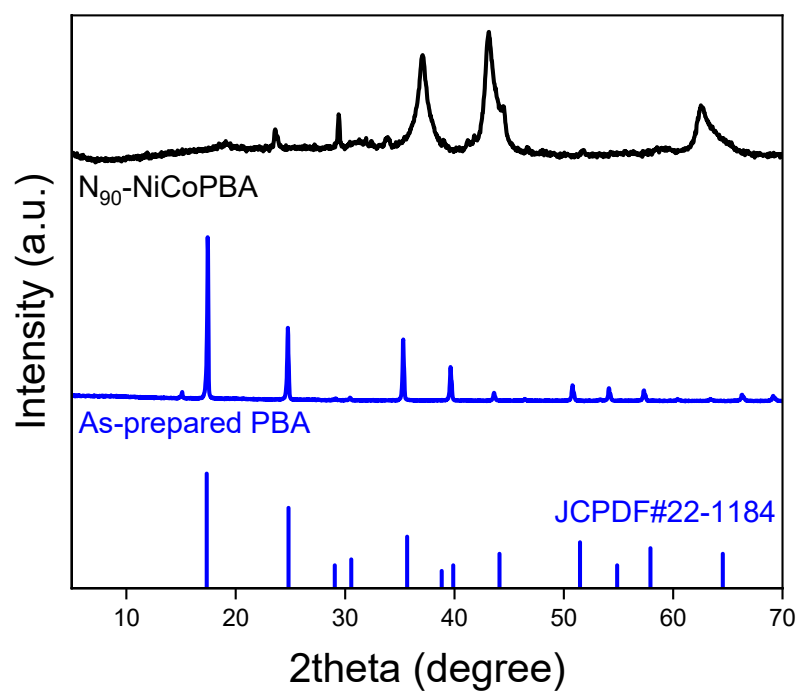

**Figure S2.** XRD results of Pristine NiCoPBA and  $N_{90}$ -NiCoPBA.

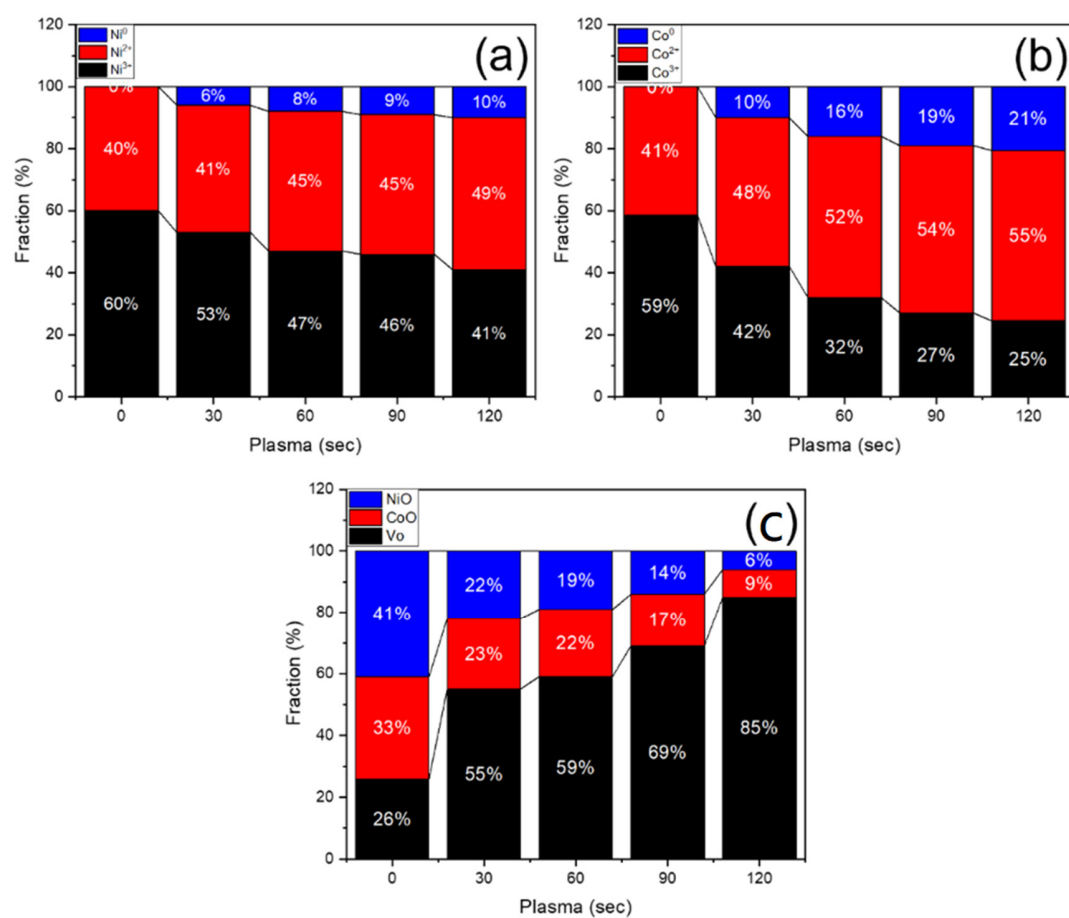

**Figure S3.** Phase percentage of (a) Ni2p, (b) Co2p, (c) O1s from deconvolution of high resolution XPS.

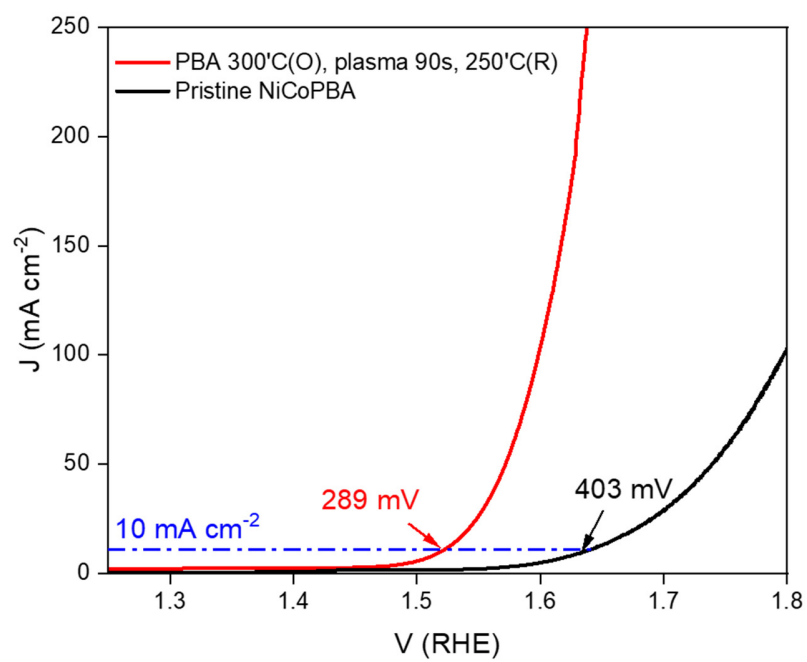

**Figure S4.** Linear sweep voltammetry (LSV) curves of Pristine-PBA and N<sub>90</sub>-NiCoPBA at a scan rate of 0.5 mV s<sup>-1</sup>.

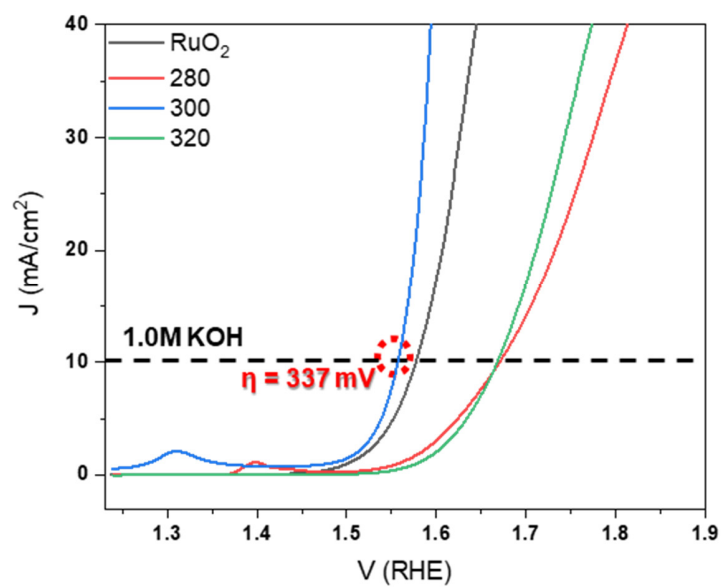

**Figure S5.** Linear sweep voltammetry (LSV) curves were recorded at a scan rate of  $0.5 \text{ mV s}^{-1}$ .
